# Supplementary material
Source: publisher figshare collection journal article supplement (https://frontiersin.figshare.com/ndownloader/files/18600251)
Supplement: Supplementary file [file 18600251]

|          | CNMT-like |        |         |         |         |        | RNMT-like |        |         | TNMT-like |        |        |        |         | Inactive |
|----------|-----------|--------|---------|---------|---------|--------|-----------|--------|---------|-----------|--------|--------|--------|---------|----------|
|          | CjCNMT    | TfCNMT | GFLNMT6 | GFLNMT5 | GFLNMT1 | PsCNMT | TfPavNMT  | PsRNMT | GFLNMT4 | GFLNMT2   | PsTNMT | PbTNMT | EcTNMT | GFLNMT3 | PsNMT4   |
| CjCNMT   | 100       | 86     | 76      | 62      | 65      | 62     | 59        | 49     | 59      | 49        | 46     | 45     | 47     | 49      | 48       |
| TfCNMT   |           | 100    | 74      | 60      | 65      | 61     | 58        | 49     | 56      | 50        | 47     | 46     | 48     | 49      | 49       |
| GFLNMT6  |           |        | 100     | 62      | 66      | 60     | 60        | 51     | 59      | 53        | 47     | 46     | 49     | 50      | 47       |
| GFLNMT5  |           |        |         | 100     | 65      | 61     | 59        | 51     | 53      | 49        | 46     | 45     | 49     | 52      | 46       |
| GFLNMT1  |           |        |         |         | 100     | 78     | 61        | 56     | 59      | 51        | 49     | 49     | 48     | 53      | 53       |
| PsCNMT   |           |        |         |         |         | 100    | 56        | 52     | 54      | 47        | 49     | 49     | 47     | 48      | 49       |
| TfPavNMT |           |        |         |         |         |        | 100       | 56     | 60      | 52        | 48     | 48     | 51     | 53      | 48       |
| PsRNMT   |           |        |         |         |         |        |           | 100    | 59      | 48        | 44     | 44     | 46     | 50      | 46       |
| GFLNMT4  |           |        |         |         |         |        |           |        | 100     | 49        | 47     | 46     | 45     | 51      | 46       |
| GFLNMT2  |           |        |         |         |         |        |           |        |         | 100       | 81     | 81     | 83     | 72      | 64       |
| PsTNMT   |           |        |         |         |         |        |           |        |         |           | 100    | 98     | 77     | 68      | 61       |
| PbTNMT   |           |        |         |         |         |        |           |        |         |           |        | 100    | 77     | 68      | 60       |
| EcTNMT   |           |        |         |         |         |        |           |        |         |           |        |        | 100    | 72      | 62       |
| GFLNMT3  |           |        |         |         |         |        |           |        |         |           |        |        |        | 100     | 64       |
| PsNMT4   |           |        |         |         |         |        |           |        |         |           |        |        |        |         | 100      |

**Supplementary Figure 2. Percent identity matrix for amino acid sequences of BIA *N*-methyltransferases characterized at the molecular level.** Protein sequences were obtained by translation of nucleotide sequences deposited in Genbank (accession numbers provided in Supplementary Table 1) and aligned using Clustal Omega under default parameters (Chojnacki et al., 2017). Percentage identities are shaded with from green (maximum, 100%) to minimum (red, 44%). GFLNMT3 shows both TNMT-like and RNMT-like properties. GFLNMT4 shows both RNMT-like and CNMT-like properties.

Chojnacki, S., Cowley, A., Lee, J., Foix, A., and Lopez, R. (2017). Programmatic access to bioinformatics tools from EMBL-EBI update: 2017. *Nucleic Acids Res.* 45, W550–W553. doi:10.1093/nar/gkx273.
